# Supplementary material for: Using Waste Concentrated Sodium Hydroxide Solution From Aluminum Production and Fabric Softener As Phase Transfer Agent in the Environmentally Friendly Biodiesel Synthesis
Source: Preprints.org preprint supplement (doi:10.20944/preprints202304.0293.v1), 2023-04-13
Supplement: Supplementary file 1 [file supplementary]

**Supplementary material**

**Using waste concentrated sodium hydroxide solution from aluminum production and fabric softener as phase transfer agent** **in the environmentally friendly biodiesel synthesis.**

Sandro L. Barbosa 1*, David Lee Nelson 1, Lucas Paconio 1, Moises Pedro 1, Wallans Torres Pio dos Santos 1, Alexandre P. Wentz 1, Fernando L. P. Pessoa 2, Foster A. Agblevor 3, Daniel A. Bortoleto 4

1Department of Pharmacy, Universidade Federal dos Vales do Jequitinhonha e Mucuri-UFVJM, Campus JK, Rodovia MGT 367 - Km 583, nº 5.000, Alto da Jacuba, CEP 39100-000, Diamantina/MG, Brazil. e-mail: [sandro.barbosa@ufvjm.edu](mailto:sandro.barbosa@ufvjm.edu) (S.L.B.); [dleenelson@gmail.com](mailto:dleenelson@gmail.com) (D.L.N.); lucas.paconio@ufvjm.edu.br (L.P.S.); moises.pedro@ufvjm.edu.br (M.P.); wallanst@ufvjm.edu.br (W.T.P.d.S.); [wentzap@hotmail.com](mailto:wentzap@hotmail.com) (A.P.W.)

2Centro Universitário SENAI-CIMATEC, Av. Orlando Gomes, 1845, Piatã, Salvador 41650-010, Brazil;

fernando.pessoa@fieb.org.br (F.L.P.P.)

3Utah State University, 620 East 1600 North, Suite 130, Logan UT 84341, U.S.A.; foster.agblevor@usu.edu (F.A.A.)

4Department of Geosciences, Universidade Federal do Pará, R. Augusto Corrêa, 01 - Guamá, Belém - PA, 66075-110, Brazil; dabortoleto@yahoo.com.br (D.A.B.)

*Corresponding author. Tel.: +55-38-35321234; fax: +55-38-35321234; e-mail: [sandro.barbosa@ufvjm.edu.br](mailto:sandro.barbosa@ufvjm.edu.br)

_____________________________________________________________________________________

**Abstract**: Red mud (RM) is a residue obtained from the production of alumina. It contains a high concentration of metal oxides and waste concentrated sodium hydroxide solution. To increase the value of RM, an environmentally friendly process of transesterification using waste cooking oil (WCO), MeOH and concentrated sodium hydroxide solution (CSHS) from aluminum production was proposed. Triglycerides of WCO reacted with MeOH at 60 oC to yield mixtures of fatty acid methyl esters (FAMEs) in the presence of 20% (w/w) CSHS/WCO using the CSHS (0.204 mol L-1, predetermined by potentiometric titration) from aluminum production by the Bayer process or with the addition of 5% (w/w) fabric softener (3% w/w solution) as a phase transfer (PTA) agent. The addition of PTA to the catalyst resulted in a better yield of the products (upper 98% yields). A simplified mechanism is presented to account for the experimental results.

*Keywords:* Environment friendly processes; Bayer residue; waste management; bauxite, contaminants, quality control, fatty acid methyl acid. ____________________________________________________________________________________

**Copies of spectra**

1) Waste cooking oil





a – methyl protons

b – methyl protons of lonilenic acid

c – methylene protons of fatty acids of tryacylclycerol

d – β-carboxylic protons

e – allylic protons outside

f – α-carboxylic protons

g – internal allylic protons

h + i – methylenic protons of the glycerol

j – H-2 proton of glycerol methylenic

k – olefinic protons

k

j

i

h

g

f

e

d

c

b

a

Figure SM 1. 1H NMR WCO.





D

B

A

C

E

A – Aliphatics

B – CH2-O

C – CH-O

D – Olefin

E – Triglyceride carboxyls

Figure SM 2. 13C NMR WCO.

2) FAME (Fatty acid methyl ester)

a – terminal methyl protons

b + c – backbone methylenes

d – β-carboxylic protons (methylene to ester)

e – α-carboxylic protons (methylene to double bond)

f – α-methylene to ester

g – bis-allylic protons

h – methoxy protons

i – olefinic protons

i

h

g

f

e

d

b

c

a

A – Methylene & methyl carbons

B – Methoxy carbon

C – olefinic carbons

D – Carbonyl carbons

D

C

B

A





i

h

g

f

e

d

c

b

a

a – terminal methyl protons

b + c – backbone methylenes

d – β-carboxylic protons (methylene to ester)

e – α-carboxylic protons (methylene to double bond)

f – α-methylene to ester

g – bis-allylic protons

h – methoxy protons

i – olefinic protons

Figure SM 3. 1H NMR Fatty acid methyl ester using CSHS as catalyst without fabric softener.





A – Methylene & methyl carbons

B – Methoxy carbon

C – olefinic carbons

D – Carbonyl carbons

D

C

B

A

Figure SM 4. 13C NMR Fatty acid methyl ester using CSHS as catalyst without fabric softener.





i

h

g

f

e

d

c

b

a

a – terminal methyl protons

b + c – backbone methylenes

d – β-carboxylic protons (methylene to ester)

e – α-carboxylic protons (methylene to double bond)

f – α-methylene to ester

g – bis-allylic protons

h – methoxy protons

i – olefinic protons

Figure SM 5. 1H NMR Fatty acid methyl ester using CSHS as catalyst with fabric softener.





A – Methylene & methyl carbons

B – Methoxy carbon

C – olefinic carbons

D – Carbonyl carbons

D

C

B

A

Figure SM 6. 13C NMR Fatty acid methyl ester using CSHS as catalyst with fabric softener.
